# Supplementary material for: Determining the chemical composition of diamagnetic mixed solids via measurements of their magnetic susceptibility
Source: Royal Society of Chemistry journal article supplement (doi:10.1039/d4tc00757c), 2024-01-01
Supplement: d4tc00757c1.pdf [file d4tc00757c1.pdf]

# Determining the Chemical Composition of Diamagnetic Mixed Solids via Measurements of the Magnetic Susceptibility

Miao Miao Zhao, Yang Yang, Na Du, Yu Ying Zhu, Peng Ren, Fei Yen\*

\*Email: fyen@hit.edu.cn, fyen18@hotmail.com

School of Science, Harbin Institute of Technology, Shenzhen, University Town, Shenzhen, Guangdong 518055 P. R. China.

## Supplementary Information:

1. Experimental details
2. Tables listing the doping concentrations  $\delta$  and molar magnetic susceptibilities  $\chi_{\text{Mol}}$  of Examples 1-8 (**Tables S1-S8**).
3. List of experimentally obtained  $\chi_{\text{Mol}}$  (**Table S9**).
4. Determination of  $\delta$  of  $\text{NH}_4(1-\delta)\text{D}_\delta\text{Br}$  (Example 1) and  $\text{NH}_4\text{I}_{1-\delta}\text{Br}_\delta$  (Example 2) from lattice parameters (**Figures S1 & S2**).
5. Determination of  $\delta$  of  $(\text{NH}_4\text{H}_2)_{1-\delta}(\text{ND}_4\text{D}_2)_\delta\text{PO}_4$  (Example 3) via measurements of the critical temperatures of the order-disorder phase transition (**Figure S3 & S4**).

## 1. Experimental details:

### a) Magnetic susceptibility measurements:

The magnetic susceptibility was measured by the vibrating sample magnetometer (VSM) option of a Physical Properties Measurement System (PPMS) manufactured by Quantum Design, Inc. All measurements were performed at 300.00 K. The ramping speed of the applied magnetic field was set to 20 Oe/s. GE varnish was used to secure the samples onto the sample rods. The mass of the varnish was always measured so its diamagnetic contribution can be subtracted.

### b) Sample preparation:

$\text{NH}_4(1-\delta)\text{D}_4\delta\text{Br}$ : Ammonium bromide  $\text{NH}_4\text{Br}$  (CAS#: 12124-97-9, 99.99% in purity) was mixed in different ratios of deionized  $\text{H}_2\text{O}$  and  $\text{D}_2\text{O}$  (99.5% deuterium) to form a solution. After slow evaporation, the formed crystals were collected, grounded to powder and compressed into pellets of sizes 5 mm in diameter and 2 mm in height.

$\text{NH}_4\text{I}_{1-\delta}\text{Br}_\delta$ :  $\text{NH}_4\text{Br}$  and ammonium iodide  $\text{NH}_4\text{I}$  (CAS#: 12027-06-4, 99.999%) were mixed in deionized  $\text{H}_2\text{O}$  to form a solution. The slow evaporation method was also used and the mixed crystals were grounded and compressed into pellets.

$(\text{NH}_4\text{H}_2)_{1-\delta}(\text{ND}_4\text{D}_2)_\delta\text{PO}_4$ : Ammonium dihydrogen phosphate  $(\text{NH}_4)\text{H}_2\text{PO}_4$  (CAS#: 7722-76-1,  $\geq 99.99\%$ ) was dissolved in different ratios of  $\text{H}_2\text{O}$  and  $\text{D}_2\text{O}$  (starting solutions are listed in Table S3). After slow evaporation, the collected crystals were grounded and pressed into pellet-form.

Pure solids of  $\text{NH}_4\text{I}$ ,  $\text{NH}_4\text{Br}$  and  $\text{NH}_4\text{H}_2\text{PO}_4$ : powder was taken straight from the reagent bottles and compressed into disc-shaped pellets.

For the remaining five series of examples, different quantities of the ten parent compounds were dry mixed, finely grounded into powder and pressed into pellets. Their control  $\delta$  were determined from the masses of the parent compounds prior to mixing. The parent compounds were: Zirconium 1,4-dicarboxybenzene MOF,  $\text{C}_{48}\text{H}_{28}\text{O}_{32}\text{Zr}_6$  (UiO-66, CAS#: 1072413-89-8,  $\geq 97\%$  in purity);  $\text{C}_{48}\text{H}_{22}\text{Br}_6\text{O}_{32}\text{Zr}_6$  (UiO-66-Br, CAS#: 1260119-02-5, 97%); creatine,  $\text{C}_4\text{H}_9\text{N}_3\text{O}_2$  (CAS#: 57-00-1, 98%);  $\text{D}$ -glucose,  $\text{C}_6\text{H}_{12}\text{O}_6$  (CAS#: 50-99-7,  $\geq 99.5\%$ ),  $\text{L}$ -glutamic acid,  $\text{C}_5\text{H}_9\text{NO}_4$  (CAS#: 56-86-0,  $\geq 99.5\%$ );  $\text{L}$ -leucine,  $\text{C}_6\text{H}_{13}\text{NO}_2$  (CAS#: 61-90-5, 99%); terephthalic acid,  $\text{C}_8\text{H}_6\text{O}_4$  (CAS#: 100-21-0, 99%); trimesic acid,  $\text{C}_9\text{H}_6\text{O}_6$  (CAS#: 554-95-0, 98%); *p*-terphenyl,  $\text{C}_{18}\text{H}_{14}$  (CAS#: 92-94-4,  $\geq 99.5\%$ ); and triphenylphosphine,  $\text{C}_{18}\text{H}_{15}\text{P}$  (CAS#: 603-35-0,  $> 99\%$ ).

**c) Lattice constant measurements:**

The lattice constants were obtained by using a Rigaku XtaLAB CCD diffractometer equipped with graphite-monochromated Mo K $\alpha$  radiation ( $\lambda = 0.71073 \text{ \AA}$ ) via the  $\omega$ - $\phi$  scanning technique. Single crystals taken directly from the mother liquor were placed in paraffin oil for their analyses. The crystals were mounted on a nylon loop and placed on the goniometer for data collection. All measurements were performed at 300 K.

**2. Tables listing the doping concentrations  $\delta$  and molar magnetic susceptibilities  $\chi_{\text{Mol}}$  of examples 1-8.**

The obtained molar magnetic susceptibility  $\chi_{\text{Mol}}$  and doping concentration  $\delta$  of the series of samples in Examples 1 to 8 (Figures 4 to 11) are listed in Tables S1 to S8, respectively.  $\chi_{\text{Mass}}$  is the measured mass magnetic susceptibility for every sample. A comparison of  $\delta$  obtained with the magnetic susceptibility method and control is also provided in the last columns. The difference in  $\delta$  obtained from the current method and from a second control method was on average 1.86%, which is nearly twice as the theoretical expected value. This discrepancy may be attributed to uncertainties of the control method and errors introduced during the weighing process of the samples.

| $\delta$ in starting solution | Sample mass (mg) | $\chi_{\text{Mass}}$ (emu/g-Oe $\times 10^{-6}$ ) | $\chi_{\text{Mol}}$ (cm <sup>3</sup> /mol $\times 10^{-6}$ ) | $\delta$ from $\chi_{\text{Mol}}$ | $\delta$ from lattice constant | $\delta - \chi_{\text{Mol}} / \delta - \text{control} \%$ |
|-------------------------------|------------------|---------------------------------------------------|--------------------------------------------------------------|-----------------------------------|--------------------------------|-----------------------------------------------------------|
| 0.00                          | 35.4             | -0.50066(6)                                       | -49.036(6)                                                   | 0                                 | 0                              | --                                                        |
| 0.25                          | 17.2             | -0.50200(12)                                      | -49.555(10)                                                  | 0.192(5)                          | 0.187                          | 2.67                                                      |
| 0.67                          | 16.4             | -0.50495(12)                                      | -50.744(61)                                                  | 0.634(25)                         | 0.626                          | 1.28                                                      |
| 0.83                          | 39.8             | -0.50564(5)                                       | -50.972(55)                                                  | 0.719(22)                         | 0.747                          | -3.75                                                     |
| 0.999 $\times$ 3              | 14.7             | -0.50718(14)                                      | -51.674(14)                                                  | 0.980                             | 0.980                          | --                                                        |

**Table S1.** Measured values of the NH<sub>4</sub>(1- $\delta$ )D<sub>48</sub>Br series: mass magnetic susceptibility  $\chi_{\text{Mass}}$ , molar magnetic susceptibility  $\chi_{\text{Mol}}$  and doping concentration  $\delta$  from two methods. “ $\delta$  in starting solution” takes into account the molar quantities of the reagent: H<sub>2</sub>O plus D<sub>2</sub>O. The last column contrasts the obtained values of  $\delta$  via the  $\chi_{\text{Mol}}$  and XRD methods by taking their ratio minus one and multiplying by 100.

| $\delta$ in starting solution | Sample mass (mg) | $\chi_{\text{Mass}}$ (emu/g-Oe $\times 10^{-6}$ ) | $\chi_{\text{Mol}}$ (cm <sup>3</sup> /mol $\times 10^{-6}$ ) | $\delta$ from $\chi_{\text{Mol}}$ | $a$ from XRD ( $\text{\AA}$ ) |
|-------------------------------|------------------|---------------------------------------------------|--------------------------------------------------------------|-----------------------------------|-------------------------------|
| 0.00                          | 41.6             | -0.44133(5)                                       | -63.968(7)                                                   | 0                                 | 7.2758                        |
| 0.06                          | 12.8             | -0.44381(16)                                      | -63.065(87)                                                  | 0.060(6)                          | 7.2530                        |
| 0.09                          | 18.3             | -0.44435(11)                                      | -62.870(67)                                                  | 0.073(4)                          | 7.2481                        |
| 0.25                          | 16.4             | -0.45087(12)                                      | -60.671(73)                                                  | 0.221(4)                          | 7.1859                        |
| 0.98                          | 25.6             | -0.49588(8)                                       | -49.871(68)                                                  | 0.944(3)                          | 4.0590                        |
| 1.00                          | 35.4             | -0.50066(6)                                       | -49.036(6)                                                   | 1                                 | 4.0659*                       |

**Table S2.** Measured values of the NH<sub>4</sub>I<sub>1- $\delta$</sub> Br <sub>$\delta$</sub>  series; \*value from Ref. 28.

| $\delta$ in starting solution | Sample mass (mg) | $\chi_{\text{Mass}}$ (emu/g-Oe $\times 10^{-6}$ ) | $\chi_{\text{Mol}}$ (cm <sup>3</sup> /mol $\times 10^{-6}$ ) | $\delta$ from $\chi_{\text{Mol}}$ | $\delta$ from $T_C$ | $\delta\text{-}\chi_{\text{Mol}} / \delta\text{-control \%}$ |
|-------------------------------|------------------|---------------------------------------------------|--------------------------------------------------------------|-----------------------------------|---------------------|--------------------------------------------------------------|
| 0.00                          | 13.1             | -0.50177(15)                                      | -57.717(18)                                                  | 0                                 | 0                   | --                                                           |
| 0.20                          | 21.4             | -0.50695(9)                                       | -58.692(34)                                                  | 0.124(7)                          | 0.120               | 3.33                                                         |
| 0.40                          | 6.5              | -0.51296(31)                                      | -59.853(60)                                                  | 0.274(10)                         | 0.261               | 4.98                                                         |
| 0.60                          | 8.9              | -0.51578(22)                                      | -60.448(73)                                                  | 0.351(8)                          | 0.336               | 4.46                                                         |
| 0.80                          | 7.8              | -0.52678(26)                                      | -62.640(99)                                                  | 0.644(11)                         | 0.644               | 0.00                                                         |

**Table S3.** Measured values of the  $(\text{NH}_4\text{H}_2)_{1-\delta}(\text{ND}_4\text{D}_2)_\delta\text{PO}_4$  series.

| $\delta$ in starting mixture | Sample mass (mg) | $\chi_{\text{Mass}}$ (emu/g-Oe $\times 10^{-6}$ ) | $\chi_{\text{Mol}}$ (cm <sup>3</sup> /mol $\times 10^{-6}$ ) | $\delta$ from $\chi_{\text{Mol}}$ | $\delta\text{-}\chi_{\text{Mol}} / \delta\text{-control \%}$ |
|------------------------------|------------------|---------------------------------------------------|--------------------------------------------------------------|-----------------------------------|--------------------------------------------------------------|
| 0.000                        | 6.5              | -0.35796(31)                                      | -765.11(66)                                                  | 0                                 | --                                                           |
| 0.497                        | 9.9              | -0.40877(20)                                      | -776.83(107)                                                 | 0.501(7)                          | 0.80                                                         |
| 0.720                        | 11.3             | -0.43495(18)                                      | -781.90(125)                                                 | 0.718(7)                          | -0.28                                                        |
| 0.852                        | 10.4             | -0.45481(19)                                      | -788.70(141)                                                 | 0.867(8)                          | 1.76                                                         |
| 1.000                        | 10               | -0.47386(20)                                      | -788.52(33)                                                  | 1.000                             | --                                                           |

**Table S4.** Measured values of the  $[\text{UiO-66-Br}]_{(1-\delta)}[\text{UiO-66}]_\delta$  series.

| $\delta$ in starting mixture | Sample mass (mg) | $\chi_{\text{Mass}}$ (emu/g-Oe $\times 10^{-6}$ ) | $\chi_{\text{Mol}}$ (cm <sup>3</sup> /mol $\times 10^{-6}$ ) | $\delta$ from $\chi_{\text{Mol}}$ | $\delta\text{-}\chi_{\text{Mol}} / \delta\text{-control \%}$ |
|------------------------------|------------------|---------------------------------------------------|--------------------------------------------------------------|-----------------------------------|--------------------------------------------------------------|
| 0.000                        | 14.3             | -0.57157(14)                                      | -74.950(18)                                                  | 0                                 | --                                                           |
| 0.223                        | 11.0             | -0.57770(18)                                      | -82.892(426)                                                 | 0.217(14)                         | -2.69                                                        |
| 0.410                        | 17.2             | -0.58260(12)                                      | -88.311(466)                                                 | 0.417(16)                         | 1.71                                                         |
| 0.880                        | 20.0             | -0.59230(10)                                      | -104.032(375)                                                | 0.908(15)                         | 3.19                                                         |
| 1.000                        | 14.0             | -0.59383(14)                                      | -106.98(3)                                                   | 1.000                             | --                                                           |

**Table S5.** Measured values of the  $[\text{creatine}]_{(1-\delta)}[\text{D-glucose}]_\delta$  series.

| $\delta$ in starting mixture | Sample mass (mg) | $\chi_{\text{Mass}}$ (emu/g-Oe $\times 10^{-6}$ ) | $\chi_{\text{Mol}}$ (cm <sup>3</sup> /mol $\times 10^{-6}$ ) | $\delta$ from $\chi_{\text{Mol}}$ | $\delta\text{-}\chi_{\text{Mol}} / \delta\text{-control \%}$ |
|------------------------------|------------------|---------------------------------------------------|--------------------------------------------------------------|-----------------------------------|--------------------------------------------------------------|
| 0.000                        | 14.0             | -0.55413(14)                                      | -81.529(21)                                                  | 0                                 | --                                                           |
| 0.146                        | 13.6             | -0.57626(15)                                      | -83.430(24)                                                  | 0.147(2)                          | 0.68                                                         |
| 0.590                        | 9.6              | -0.64620(21)                                      | -89.057(36)                                                  | 0.581(3)                          | -1.52                                                        |
| 0.651                        | 13.3             | -0.65777(15)                                      | -89.936(33)                                                  | 0.649(3)                          | -0.31                                                        |
| 1.000                        | 13.3             | -0.72033(15)                                      | -94.486(20)                                                  | 1.000                             | --                                                           |

**Table S6.** Measured values of the  $[\text{L-glutamic acid}]_{(1-\delta)}[\text{L-leucine}]_\delta$  series.

| $\delta$ in starting mixture | Sample mass (mg) | $\chi_{\text{Mass}}$ (emu/g-Oe $\times 10^{-6}$ ) | $\chi_{\text{Mol}}$ (cm <sup>3</sup> /mol $\times 10^{-6}$ ) | $\delta$ from $\chi_{\text{Mol}}$ | $\delta\text{-}\chi_{\text{Mol}} / \delta\text{-control \%}$ |
|------------------------------|------------------|---------------------------------------------------|--------------------------------------------------------------|-----------------------------------|--------------------------------------------------------------|
| 0.000                        | 23.0             | -0.52028(9)                                       | -86.434(14)                                                  | 0                                 | --                                                           |
| 0.170                        | 17.0             | -0.50826(12)                                      | -88.276(62)                                                  | 0.172(4)                          | 1.18                                                         |
| 0.632                        | 19.4             | -0.48052(10)                                      | -93.243(109)                                                 | 0.634(6)                          | 0.32                                                         |
| 0.685                        | 13.9             | -0.47819(14)                                      | -93.866(122)                                                 | 0.678(7)                          | -1.02                                                        |
| 1.000                        | 12.5             | -0.46240(16)                                      | -97.168(33)                                                  | 1.000                             | --                                                           |

**Table S7.** Measured values of the [terephthalic acid]<sub>(1-δ)</sub>[trimesic acid]<sub>δ</sub> series.

| δ in starting mixture | Sample mass (mg) | χ <sub>Mass</sub> (emu/g-Oe × 10 <sup>-6</sup> ) | χ <sub>Mol</sub> (cm <sup>3</sup> /mol × 10 <sup>-6</sup> ) | δ from χ <sub>Mol</sub> | δ-χ <sub>Mol</sub> / δ-control % |
|-----------------------|------------------|--------------------------------------------------|-------------------------------------------------------------|-------------------------|----------------------------------|
| 0.000                 | 13.7             | -0.68065(15)                                     | -178.54(4)                                                  | 0                       | --                               |
| 0.209                 | 17.4             | -0.68291(11)                                     | -174.34(98)                                                 | 0.219(48)               | 4.78                             |
| 0.281                 | 14.8             | -0.68359(14)                                     | -173.16(75)                                                 | 0.282(29)               | -0.36                            |
| 0.589                 | 17.1             | -0.68676(12)                                     | -167.68(85)                                                 | 0.567(40)               | -3.74                            |
| 1.000                 | 11.8             | -0.69208(17)                                     | -159.39(4)                                                  | 1.000                   | --                               |

**Table S8.** Measured values of the [triphenylphosphine]<sub>(1-δ)</sub>[*p*-terphenyl]<sub>δ</sub> series.**3. List of experimentally obtained χ<sub>Mol</sub>.**

| Compound name                                                                   | χ <sub>Mol</sub> (cm <sup>3</sup> /mol × 10 <sup>-6</sup> ) (Experimental) | χ <sub>Mol</sub> (cm <sup>3</sup> /mol × 10 <sup>-6</sup> ) (Expected) | Sample purity (%) |
|---------------------------------------------------------------------------------|----------------------------------------------------------------------------|------------------------------------------------------------------------|-------------------|
| NH <sub>4</sub> Br                                                              | -49.036(6)                                                                 | -47.9                                                                  | 99.99             |
| ND <sub>4</sub> Br                                                              | -51.674(14)*                                                               | N/A <sup>†</sup>                                                       | 100 - <i>d</i>    |
| NH <sub>4</sub> I                                                               | -63.968(7)                                                                 | -63.9                                                                  | 99.999            |
| NH <sub>4</sub> H <sub>2</sub> PO <sub>4</sub>                                  | -57.717(18)                                                                | -63.86                                                                 | 99.99             |
| ND <sub>4</sub> D <sub>2</sub> PO <sub>4</sub>                                  | -65.402(30)*                                                               | N/A <sup>†</sup>                                                       | 100 - <i>d</i>    |
| C <sub>48</sub> H <sub>28</sub> O <sub>32</sub> Zr <sub>6</sub>                 | -788.52(33)                                                                | N/A <sup>‡</sup>                                                       | ≥97               |
| C <sub>48</sub> H <sub>22</sub> Br <sub>6</sub> O <sub>32</sub> Zr <sub>6</sub> | -765.11(66)                                                                | N/A <sup>‡</sup>                                                       | >97               |
| Creatine                                                                        | -74.950(18)                                                                | -77.39                                                                 | 98                |
| <i>D</i> -glucose                                                               | -106.98(3)                                                                 | -101.5                                                                 | ≥99.5             |
| <i>L</i> -glutamic acid                                                         | -81.529(21)                                                                | -78.5                                                                  | ≥99.5             |
| <i>L</i> -leucine                                                               | -94.486(20)                                                                | -84.9                                                                  | 99                |
| terephthalic acid                                                               | -86.434(14)                                                                | -84.22                                                                 | 99                |
| Trimesic acid                                                                   | -97.168(33)                                                                | -97.68                                                                 | 98                |
| Triphenylphosphine                                                              | -178.54(4)                                                                 | -187.0                                                                 | >99               |
| <i>p</i> -terphenyl                                                             | -159.39(4)                                                                 | -157.8                                                                 | ≥99.5             |

**Table S9.** List of χ<sub>Mol</sub> values of the parent compounds obtained experimentally at 300 K. The expected values of χ<sub>Mol</sub> were calculated from addition of Pascal's constants taken from Ref. 26.

\*98% deuteration.

<sup>†</sup>Pascal's constants of ND<sub>4</sub> not available in existing literature.<sup>‡</sup>Pascal's constant of the -Zr covalent bond also not available.**4. Determination of δ of the NH<sub>4(1-δ)</sub>D<sub>δ</sub>Br series (Example 1) and NH<sub>4I(1-δ)</sub>Br<sub>δ</sub> series (Example 2) from lattice parameters.**

The doping concentration δ was also extracted from measured lattice parameters of NH<sub>4(1-δ)</sub>D<sub>δ</sub>Br (Figure S1) and NH<sub>4I(1-δ)</sub>Br<sub>δ</sub> (Figure S2) as a means to check the accuracy of the obtained δ from our magnetic measurements.

The lattice constants were obtained by using a Rigaku XtaLAB CCD

diffractometer equipped with graphite-monochromated Mo K $\alpha$  radiation ( $\lambda = 0.71073$  Å) via the  $\omega$ - $\phi$  scanning technique. Single crystals taken directly from the mother liquor were placed in paraffin oil for their analyses. The crystals were mounted on a nylon loop and placed on the goniometer for data collection. All measurements were performed at 300 K.

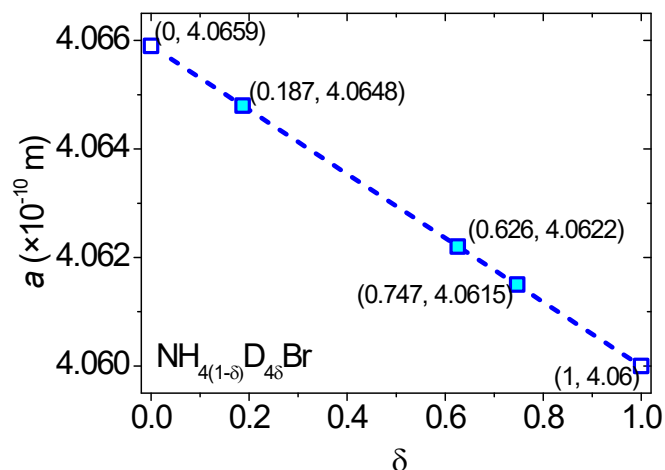

**Fig. S1.** Lattice constant  $a$  vs. isotope concentration. Open squares represent the lattice constants of  $\text{NH}_4\text{Br}$  and  $\text{ND}_4\text{Br}$  according to Levy *et al.*<sup>28</sup> and Havighurst *et al.*<sup>9</sup> The three solid squares are the obtained lattice constants of the three mixed solids and their corresponding  $\delta$ .

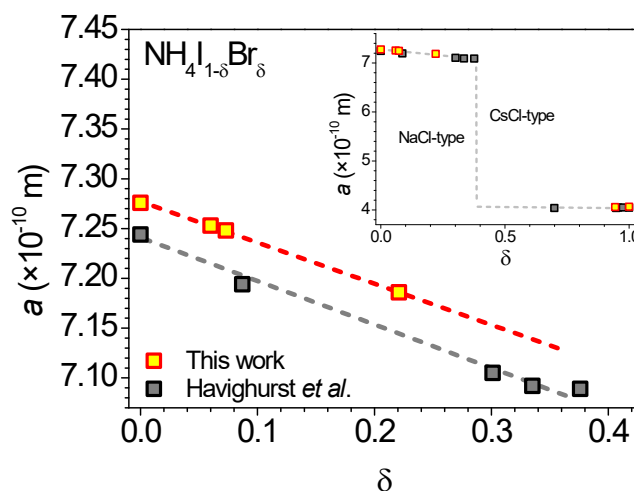

**Fig. S2.** Lattice constant  $a$  vs. halide concentration. Yellow squares are data from the last two columns of Table 2. Grey squares are data from Havighurst *et al.*<sup>9</sup> Dashed lines are linear fits. Inset shows how  $a$  is no longer additive when  $\delta > 0.37$ .

### 5. Determination of $\delta$ of the $(\text{NH}_4\text{H}_2)_{1-\delta}(\text{ND}_4\text{D}_2)_\delta\text{PO}_4$ series (Example 3) via measurements of the critical temperatures of the order-disorder phase transition.

For the series  $(\text{NH}_4\text{H}_2)_{1-\delta}(\text{ND}_4\text{D}_2)_\delta\text{PO}_4$ ,  $\delta$  was extracted from the critical temperature  $T_C$  of its order-disorder phase transition according to  $\delta = (T_C - 148 \text{ K}) / 94 \text{ K}$ .<sup>33</sup> Figure S3 shows the cooling and warming runs at 2 K/min of the mixed samples

with their respective  $T_C$ 's. Figure S4 is a graphical representation of the linear relationship between the measured  $T_C$ 's with  $\delta$ . In each case,  $\delta$  was obtained from the average  $T_C$  value of the cooling and warming curves.

The dielectric constants of the mixed crystals of the series  $(\text{NH}_4\text{H}_2)_{1-\delta}(\text{ND}_4\text{D}_2)_\delta\text{PO}_4$  were obtained from their measured capacitances with an E4980A LCR meter from Agilent Technologies. The electrodes were in to form of silver paint applied onto the surfaces perpendicular to the  $b$ -axis direction of the crystals. The applied electric field and frequency were  $\sim 5$  V/cm and 1 kHz, respectively.

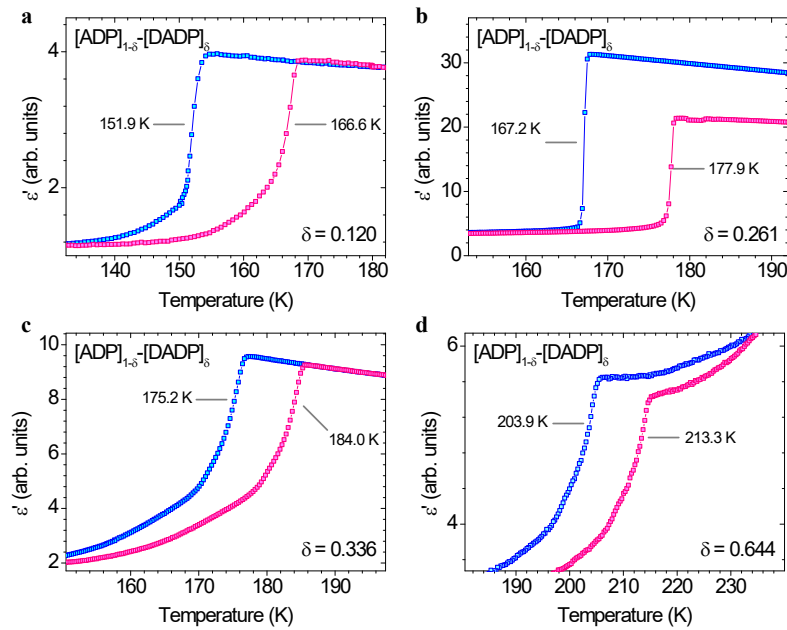

**Fig. S3.** Dielectric constant of the series  $(\text{NH}_4\text{H}_2)_{1-\delta}(\text{ND}_4\text{D}_2)_\delta\text{PO}_4$ ,  $[\text{ADP}]_{1-\delta}-[\text{DADP}]_\delta$ , with respect to temperature. The obtained  $\delta$  for the cases when a)  $\delta = 0.120$ ; b)  $\delta = 0.261$ ; c)  $\delta = 0.336$ ; and d)  $\delta = 0.644$  were obtained from the average of the critical temperatures  $T_C$  during cooling and warming for each sample.

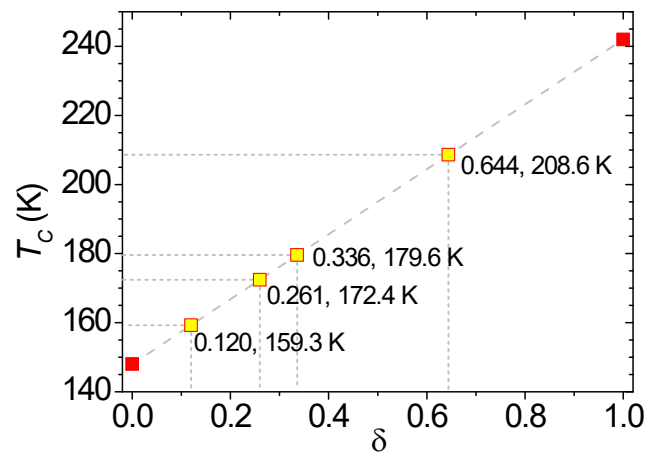

**Fig. S4.** The equation  $\delta = (T_C - 148 \text{ K}) / 94 \text{ K}$  was employed to obtain  $\delta$  from  $T_C$ . Red squares represent the parent compounds  $\text{NH}_4\text{H}_2\text{PO}_4$  and  $\text{ND}_4\text{D}_2\text{PO}_4$ ; yellow squares the four mixed samples.
